# Supplementary material for: Association of Protein Z with Prediabetes and Type 2 Diabetes
Source: PubMed Central journal article supplement — Endocrinol Metab (Seoul). 2021 Jun 2;36(3):637–46. doi: 10.3803/EnM.2021.962 (PMC8258334; doi:10.3803/enm.2021.962), 2021-06-02
Supplement: enm-2021-962-suppl1.pdf [file enm-2021-962-suppl1.pdf]

**Supplemental Table S1.** Baseline Characteristics of Subjects in Cytokine Microarray Analysis

| Characteristic         | Normoglycemia (n=16) | Prediabetes (n=14)        | T2DM (n=13)  | P value |
|------------------------|----------------------|---------------------------|--------------|---------|
| Sex, male/female       | 0/16                 | 0/14                      | 0/13         | -       |
| Age, yr                | 54.00±2.73           | 66.43±4.64                | 59.31±9.20   | <0.001  |
| Hypertension           | 0                    | 3                         | 2            | 0.168   |
| Dyslipidemia           | 0                    | 2                         | 5            | 0.015   |
| Smoking                | 0                    | 0                         | 0            | -       |
| Alcohol                | 3                    | 0                         | 1            | 0.300   |
| BMI, kg/m <sup>2</sup> | 22.04±1.54           | 22.61±1.90                | 23.53±1.50   | 0.067   |
| Waist, cm              | 74.58±5.87           | 78.38±4.69                | 82.46±5.71   | 0.002   |
| FPG, mg/dL             | 86.44±5.01           | 105.86±5.65               | 126.92±20.79 | <0.001  |
| HbA1c, %               | 5.33±0.17            | 6.04±0.17                 | 7.36±0.94    | <0.001  |
| AST, IU/L              | 23.25±6.10           | 24.57±5.14                | 24.38±8.13   | 0.834   |
| ALT, IU/L              | 15.69±6.55           | 19.57±7.52                | 25.77±14.37  | 0.031   |
| Creatinine, mg/dL      | 0.61±0.17            | 0.82±0.10                 | 0.62±0.13    | <0.001  |
| TG, mg/dL              | 127.74±95.01         | 131.01±62.72 <sup>a</sup> | 117.87±44.47 | 0.890   |
| HDL, mg/dL             | 57.64±13.49          | 52.50±14.62 <sup>a</sup>  | 52.29±12.40  | 0.482   |
| LDL, mg/dL             | 117.05±25.67         | 109.94±30.03              | 124.38±34.38 | 0.463   |
| HOMA-IR                | 0.76±0.34            | 1.85±0.83                 | 2.16±1.23    | <0.001  |
| SBP, mm Hg             | 121.44±13.81         | 126.86±12.07              | 124.08±14.75 | 0.556   |
| DBP, mm Hg             | 76.69±7.60           | 77.43±6.55                | 80.15±13.14  | 0.593   |

Values are expressed as number or mean±standard deviation. The definitions of smoking and alcohol are numbers of currently smoking and drinking in each group.

T2DM, type 2 diabetes mellitus; BMI, body mass index; FPG, fasting plasma glucose; HbA1c, hemoglobin A1c; WBC, white blood cell; AST, aspartate aminotransferase; ALT, alanine aminotransferase; TG, triglyceride; HDL, high-density lipoprotein; LDL, low-density lipoprotein; HOMA-IR, homeostatic model assessment for insulin resistance; SBP, systolic blood pressure; DBP, diastolic blood pressure.

<sup>a</sup>We analyzed TG and HDL levels of 13 subjects with prediabetes except for the missing data.
