# Supplementary material for: Association of Protein Z with Prediabetes and Type 2 Diabetes
Source: PubMed Central journal article supplement — Endocrinol Metab (Seoul). 2021 Jun 2;36(3):637–46. doi: 10.3803/EnM.2021.962 (PMC8258334; doi:10.3803/enm.2021.962), 2021-06-02
Supplement: enm-2021-962-suppl2.pdf [file enm-2021-962-suppl2.pdf]

**Supplemental Table S2.** List of 33 Cytokines Showing at Least 1.5-Fold Difference in Prediabetes Compared to Normoglycemia

| Gene symbol    | Antibody name     | Fold change (prediabetes/normoglycemia) | P value |
|----------------|-------------------|-----------------------------------------|---------|
| <i>BLK</i>     | BLK               | 3.330                                   | 0.002   |
| <i>DEFB1</i>   | BD-1              | 1.926                                   | <0.001  |
| <i>CCL18</i>   | MIP-4             | 1.817                                   | <0.001  |
| <i>CXCL13</i>  | BCA-1             | 1.763                                   | <0.001  |
| <i>CCL14</i>   | HCC-1             | 1.753                                   | <0.001  |
| <i>CXCL6</i>   | GCP-2             | 1.627                                   | <0.001  |
| <i>CRP</i>     | CRP               | 1.593                                   | 0.035   |
| <i>IGFBP7</i>  | IGF-BP7           | 1.576                                   | <0.001  |
| <i>ARTN</i>    | Artemin           | 1.543                                   | <0.001  |
| <i>ADIPOQ</i>  | Adipolean variant | 1.526                                   | <0.001  |
| <i>IL1A</i>    | IL-1alpha         | 1.522                                   | <0.001  |
| <i>TIMP1</i>   | TIMP-1            | 1.519                                   | <0.001  |
| <i>CXCL3</i>   | GRO-gamma         | 1.519                                   | 0.001   |
| <i>CDH1</i>    | Cadherin-pan      | 1.504                                   | 0.022   |
| <i>CCL13</i>   | MCP-4             | -1.511                                  | <0.001  |
| <i>IL12A</i>   | IL-12             | -1.522                                  | <0.001  |
| <i>IL11</i>    | IL-11             | -1.573                                  | <0.001  |
| <i>CCL22</i>   | MDC               | -1.617                                  | <0.001  |
| <i>IL1B</i>    | IL-1 beta         | -1.617                                  | <0.001  |
| <i>SELL</i>    | L-Selectin        | -1.622                                  | <0.001  |
| <i>IL13RA1</i> | CA19-9            | -1.683                                  | <0.001  |
| <i>IL15</i>    | IL-15             | -1.965                                  | <0.001  |
| <i>TNF</i>     | TNF-alpha         | -1.967                                  | <0.001  |
| <i>PSG2</i>    | CEA               | -2.080                                  | <0.001  |
| <i>FSHB</i>    | FSH               | -2.126                                  | <0.001  |
| <i>STAT6</i>   | STAT6             | -2.188                                  | <0.001  |
| <i>PROZ</i>    | PROZ              | -2.192                                  | <0.001  |
| <i>IGF2</i>    | IGF-II            | -2.303                                  | <0.001  |
| <i>TG</i>      | Thyroglobulin     | -2.474                                  | <0.001  |
| <i>NGF</i>     | NGF-β             | -3.751                                  | <0.001  |
| <i>ADAM2</i>   | CA15-3            | -4.385                                  | <0.001  |
| <i>IFNL2</i>   | IFN-lambda2       | -5.722                                  | <0.001  |
| <i>AFP</i>     | AFP               | -6.373                                  | <0.001  |

BLK, BLK proto-oncogene; DEFB1, defensin beta 1; BD-1, beta-defensin-1; CCL, C-C motif chemokine ligand; MIP-4, macrophage inflammatory protein-4; CXCL, C-X-C motif chemokine ligand; BCA-1, B cell-attracting chemokine 1; HCC-1, hemofiltrate CC chemokine 1; GCP-2, granulocyte chemotactic protein 2; CRP, C-reactive protein; IGF-BP7, insulin like growth factor-binding protein 7; ARTN, artemin; ADIPOQ, adiponectin, C1Q and collagen domain containing; IL, interleukin; TIMP1, TIMP metalloproteinase inhibitor 1; GRO, growth regulated protein; CDH1, cadherin 1; MCP-4, monocyte chemoattractant protein-4; MDC, macrophage-derived chemokine; SELL, selectin L; IL13RA1, interleukin 13 receptor subunit alpha 1; CA19-9, carbohydrate antigen 19-9; TNF, tumor necrosis factor; PSG2, pregnancy specific beta-1-glycoprotein 2; CEA, carcinoembryonic antigen; FSHB, follicle stimulating hormone beta; STAT6, signal transducer and activator of transcription 6; PROZ, protein Z; IGF, insulin-like growth factor; TG, thyroglobulin; NGF, nerve growth factor; ADAM2, ADAM metalloproteinase domain 2; IFNL2, interferon lambda 2; AFP, alpha-fetoprotein.
