# Supplementary material for: Association of Protein Z with Prediabetes and Type 2 Diabetes
Source: PubMed Central journal article supplement — Endocrinol Metab (Seoul). 2021 Jun 2;36(3):637–46. doi: 10.3803/EnM.2021.962 (PMC8258334; doi:10.3803/enm.2021.962), 2021-06-02
Supplement: enm-2021-962-suppl3.pdf [file enm-2021-962-suppl3.pdf]

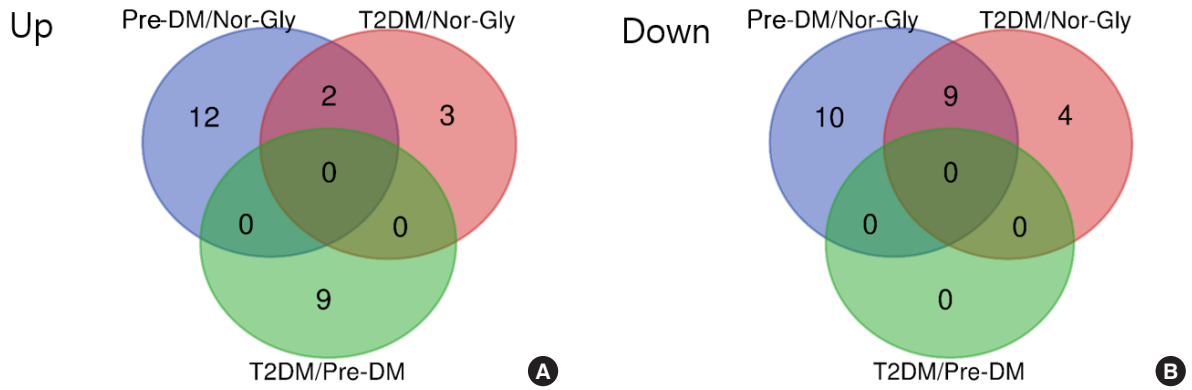

**Supplemental Fig. S1.** Venn diagram displaying the number of differentially expressed cytokines among the three groups. (A) Up regulation proteins, (B) down regulation proteins. Pre-DM, prediabetes; Nor-Gly, normoglycemia; T2DM, type 2 diabetes mellitus.
